# Supplementary material
Source: ML conference proceedings conference paper supplement (https://openaccess.thecvf.com/content/ICCV2023/html/Liu_LoTE-Animal_A_Long_ICCV_2023_paper.html)
Supplement: Supplementary file 1 [file Liu_LoTE-Animal_A_Long_ICCV_2023_supplemental.zip]

Archive with 2 entries (2 files):
- Supplementary material 1 Datasheets for LoTE-Animal Datasets.pdf
- Supplementary material 2 More Information and Results.pdf
